# Supplementary material for: Targeted LC–MS derivatization for aldehydes and carboxylic acids with a new derivatization agent 4-APEBA
Source: PubMed Central journal article supplement — Anal Bioanal Chem. 2010 Mar 19;397(2):665–75. doi: 10.1007/s00216-010-3575-1 (PMC2855813; doi:10.1007/s00216-010-3575-1), 2010-03-19
Supplement: 216_2010_3575_MOESM1_ESM.pdf [file 216_2010_3575_MOESM1_ESM.pdf]

## Supporting Information

### Targeted LC-MS derivatization for aldehydes and carboxylic acids with a new derivatization agent 4-APEBA

Mark Eggink<sup>a</sup>, Maikel Wijtmans<sup>b</sup>, Ansgar Kretschmer<sup>a</sup>, Jeroen Kool<sup>a</sup>, Henk Lingeman<sup>a</sup>, Iwan J. P. de Esch<sup>b</sup>, Wilfried M. A. Niessen<sup>a,\*</sup>, Hubertus Irth<sup>a</sup>

VU University Amsterdam, Faculty of Science, <sup>a</sup>Section of BioMolecular Analysis, and <sup>b</sup>Pharmacochemistry, Section of Medicinal Chemistry, De Boelelaan 1083, 1081 HV Amsterdam, the Netherlands.

Corresponding author: W.M.A. Niessen, [mail@hyphenms.nl](mailto:mail@hyphenms.nl)

**Supporting Data: Synthesis route toward 4-APEBA (1) and chemical characterization of products**

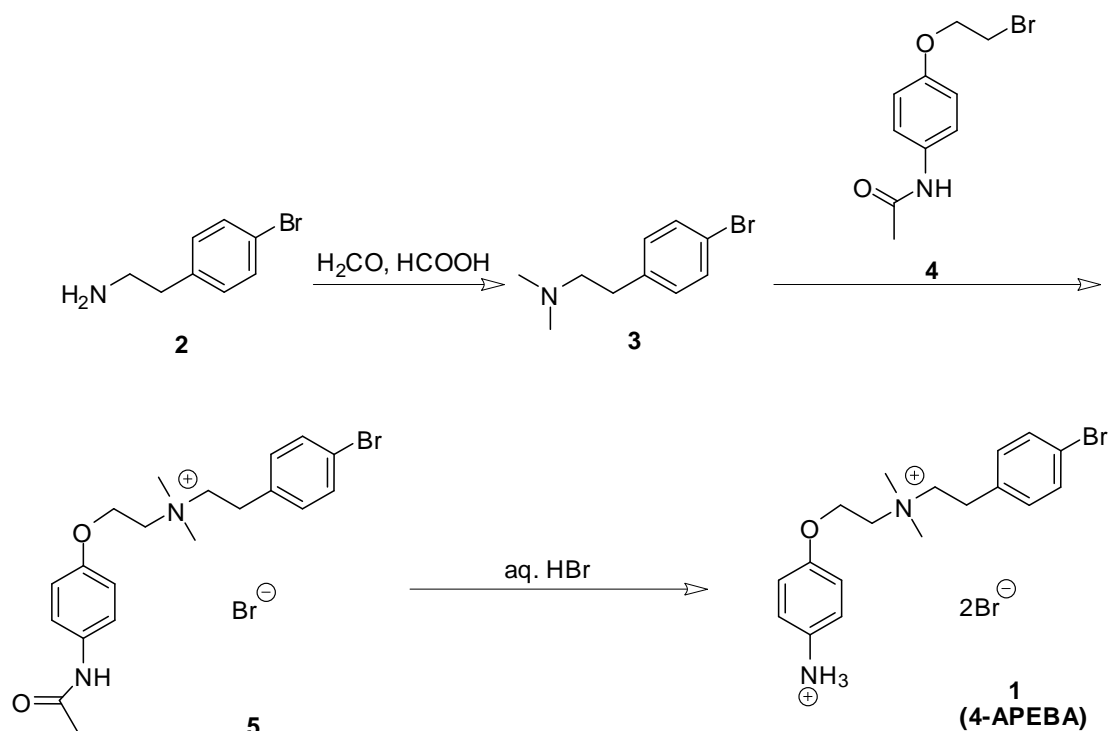

**2-(4-Bromophenyl)-*N,N*-dimethylethanamine (3).**  $^1\text{H-NMR}$  ( $\text{CDCl}_3$ , 200 MHz)  $\delta$  7.28 (d, 2H,  $J=8.4$  Hz), 6.96 (d, 2H,  $J=8.4$  Hz), 2.70-2.58 (m, 2H), 2.42-2.34 (m, 2H), 2.17 (s, 6H).

**2-(4-Acetamidophenoxy)-*N*-(4-bromophenethyl)-*N,N*-dimethylethanaminium bromide (5).**  $^1\text{H-NMR}$  ( $\text{CD}_3\text{OD}$ , 250 MHz)  $\delta$  7.47 (d, 2H,  $J=8.25$  Hz), 7.46 (d, 2H,  $J=9.0$  Hz), 7.26 (d, 2H,  $J=8.25$  Hz), 6.93 (d, 2H,  $J=9.0$  Hz), 4.51-4.43 (m, 2H), 3.94-3.87 (m, 2H), 3.72-3.63 (m, 2H), 3.28 (s, 6H), 3.20-3.12 (m, 2H), 2.08 (s, 3H).  $^{13}\text{C-NMR}$  ( $\text{CD}_3\text{OD}$ , 50 MHz)  $\delta$  171.48, 155.46, 136.31, 134.20, 133.09, 132.21, 123.06, 122.20, 115.96, 66.95, 64.34, 63.39, 52.48, 29.40, 23.69.

**4-(2-((4-Bromophenethyl)dimethylammonio)ethoxy)benzenaminium dibromide (1, 4-APEBA).**  $^1\text{H-NMR}$  ( $\text{D}_2\text{O}$ , 250 MHz)  $\delta$  7.61 (d, 2H,  $J=8.25$  Hz,  $\text{H}_a$ ), 7.41 (d, 2H,  $J=9.0$  Hz,  $\text{H}_i$ ), 7.30 (d, 2H,  $J=8.25$  Hz,  $\text{H}_b$ ), 7.15 (d, 2H,  $J=9.0$  Hz,  $\text{H}_h$ ), 4.64-4.56 (m, 2H,  $\text{H}_g$ ), 3.99-3.94 (m, 2H,  $\text{H}_f$ ), 3.79-3.71 (m, 2H,  $\text{H}_d$ ), 3.34 (s, 6H,  $\text{H}_e$ ), 3.29-3.21 (m,

2H, H<sub>c</sub>). For assignment codes of the protons, see Figure S6. <sup>13</sup>C-NMR (D<sub>2</sub>O, 50 MHz) δ 158.58, 136.04, 133.23, 132.57, 126.00, 124.62, 122.12, 117.46, 66.71, 64.04, 63.62, 53.46, 29.54. 2D-NOESY (D<sub>2</sub>O, 400 MHz): Diagnostic couplings: H<sub>f</sub> x H<sub>e</sub>; H<sub>f</sub> x H<sub>d</sub>; H<sub>f</sub> x H<sub>g</sub>; H<sub>g</sub> x H<sub>h</sub>; H<sub>h</sub> x H<sub>i</sub>; H<sub>e</sub> x H<sub>d</sub>; H<sub>c</sub> x H<sub>d</sub>; H<sub>c</sub> x H<sub>b</sub> (weak but present); H<sub>a</sub> x H<sub>b</sub>. M.p.=231.1-232.5 °C. LC-UV purity: >98 %. LC-MS purity: >98 %. IR (solid, cm<sup>-1</sup>) ν 2780, 1657, 1507, 1250, 803, 520. HR-MS (C<sub>18</sub>H<sub>24</sub>BrN<sub>2</sub>O<sup>+</sup>): calc: 363.10665 (100 %), 365.10479 (99.48 %), found: 363.10684 (100 %), 365.10521 (99.17 %). Elem. Anal. (C<sub>18</sub>H<sub>25</sub>Br<sub>3</sub>N<sub>2</sub>O): calc (%) C 41.17, H 4.80, Br 45.65, N 5.33, O 3.05; found (%) C 41.25, H 4.89, Br 45.3, N 5.25, O 3.25.

**Solution stability of 4-APEBA.** 4-APEBA was left in aerated D<sub>2</sub>O (30 mM, NMR tube) in room light at room temperature for 70 days. The solution does discolor a little bit and 4-APEBA starts to precipitate over time. However, <sup>1</sup>H-NMR analyses of the vortexed solution taken at regular intervals, including after 70 days, showed a spectrum identical to that of a freshly prepared solution. In a similar incubation experiment (23 mM in D<sub>2</sub>O), the sample was tested after 30 days in a typical aldehyde derivatization (see main text) run alongside freshly dissolved 4-APEBA (23 mM, freshly prepared in D<sub>2</sub>O). Here, no drop in derivatization activity was detected for the 30-day sample, i.e., both solutions worked equally well. Notwithstanding these excellent stability results, it is recommended to prepare fresh 4-APEBA solutions.

## Supporting Figures

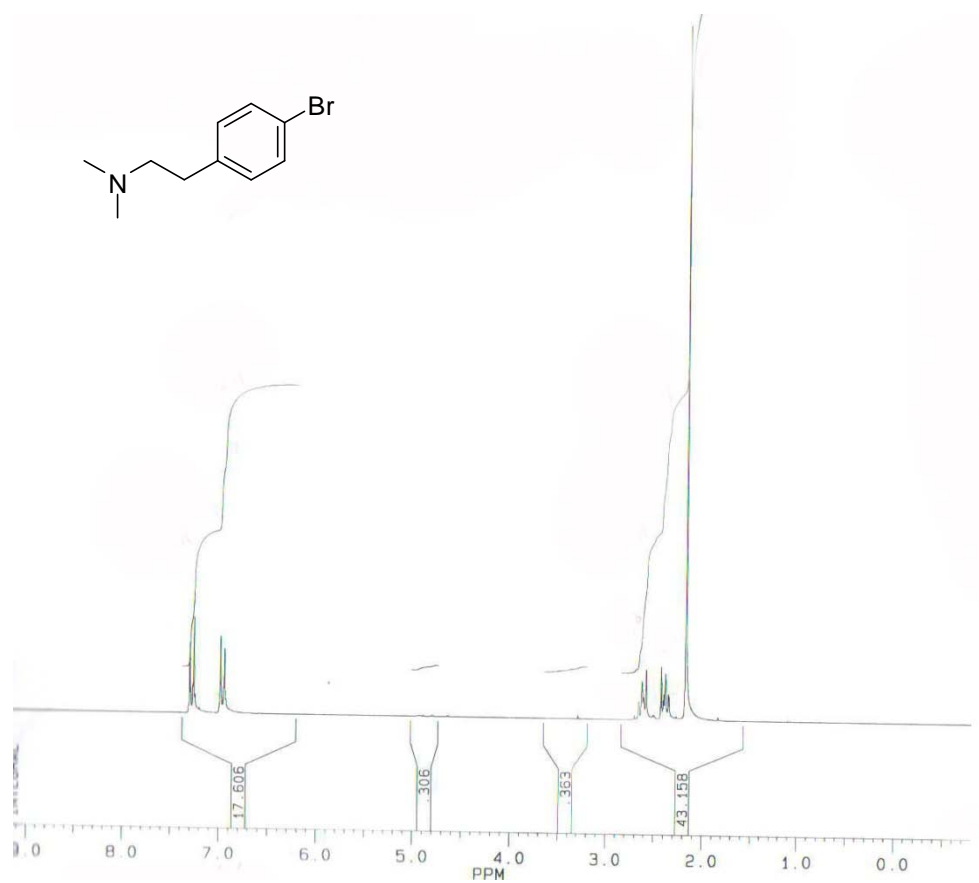

**Figure S1.**  $^1\text{H-NMR}$  spectrum of compound **3** in  $\text{CDCl}_3$ .

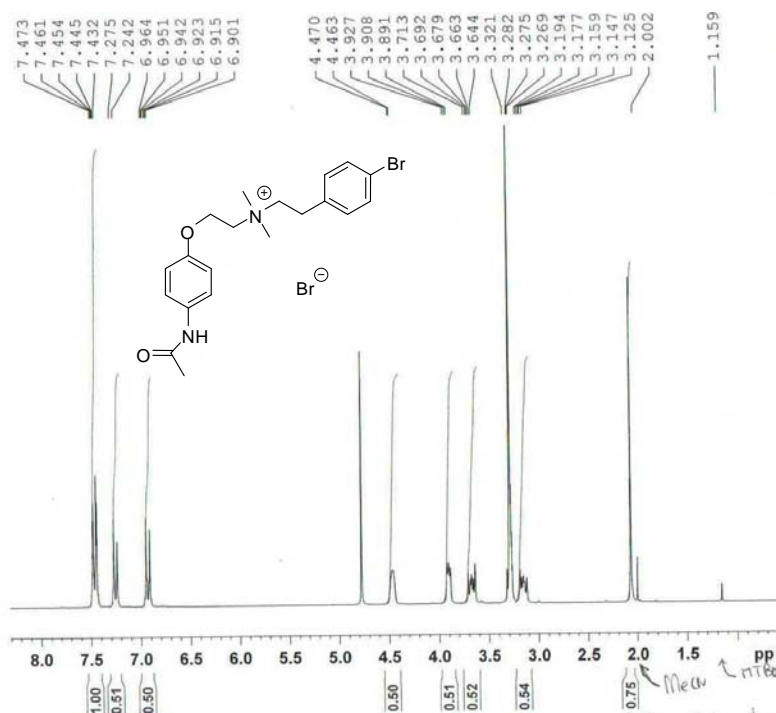

**Figure S2.** <sup>1</sup>H-NMR spectrum of recrystallized compound **5** in d<sub>4</sub>-MeOD. Traces of crystallization solvents MTBE, MeCN and MeOH are visible.

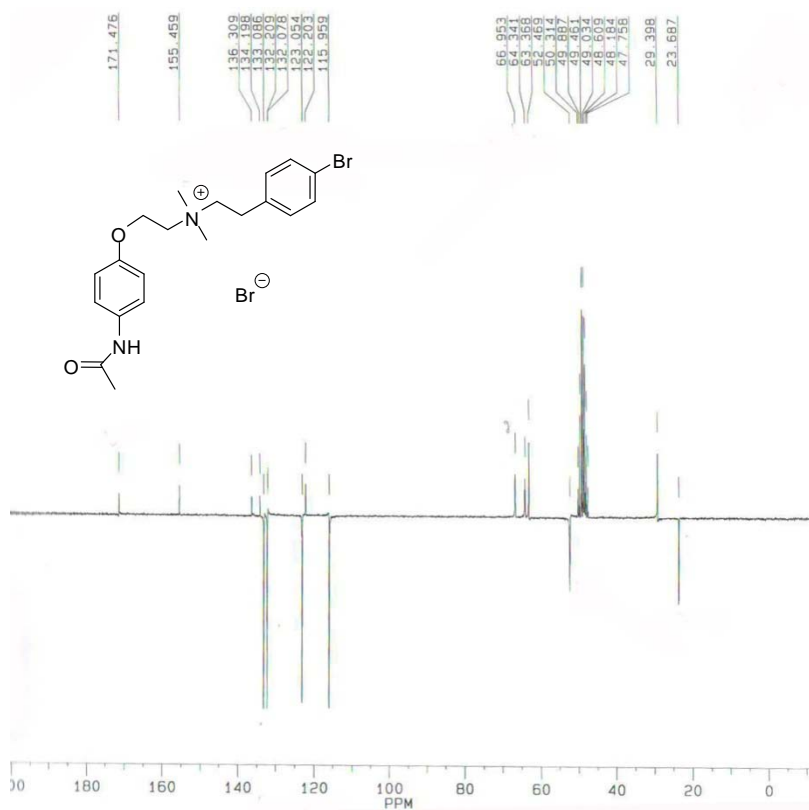

**Figure S3.** <sup>13</sup>C-APT spectrum of compound **5** in d<sub>4</sub>-MeOD.

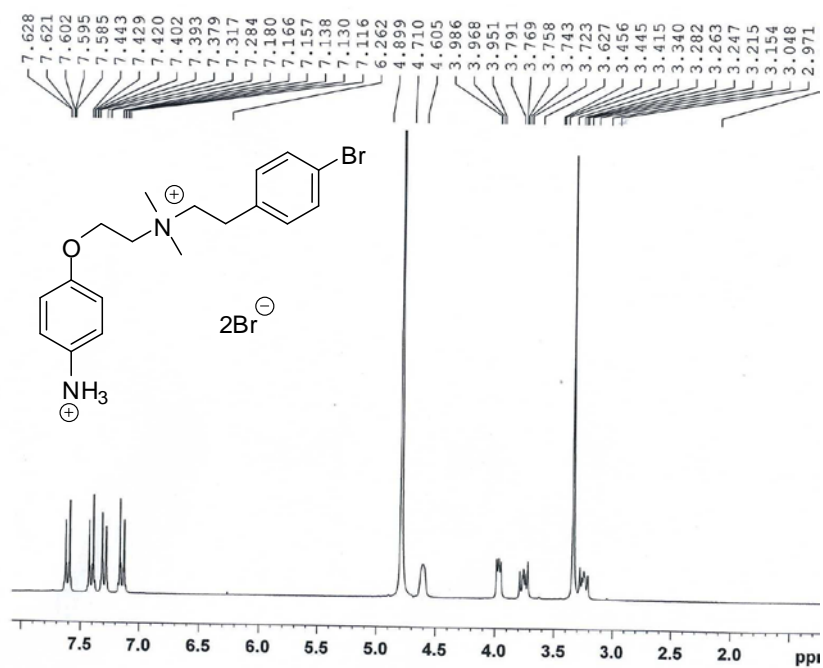

Figure S4.  $^1\text{H-NMR}$  spectrum of compound 1 in  $\text{D}_2\text{O}$ .

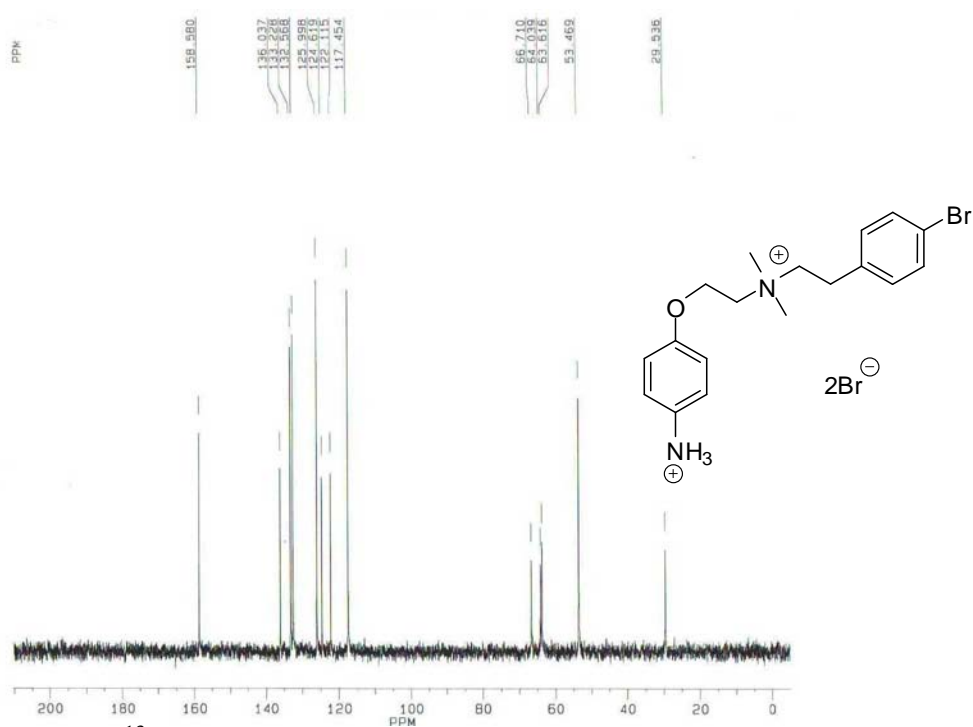

Figure S5.  $^{13}\text{C-NMR}$  spectrum of compound 1 in  $\text{D}_2\text{O}$ .

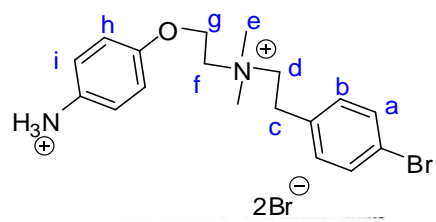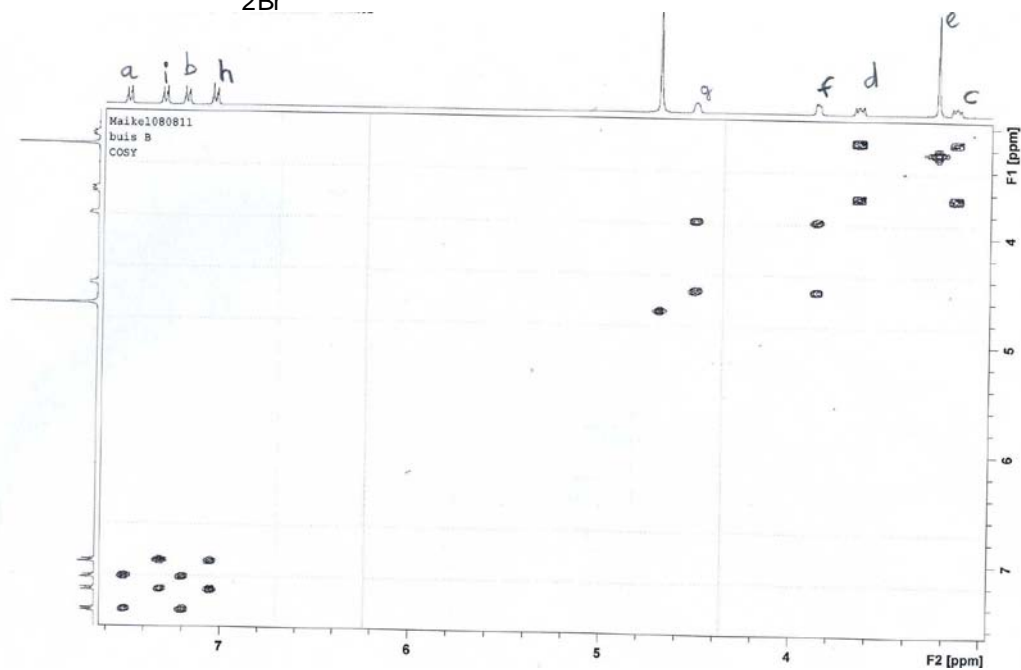

**Figure S6.** 2D-COSY of compound **1** in D<sub>2</sub>O

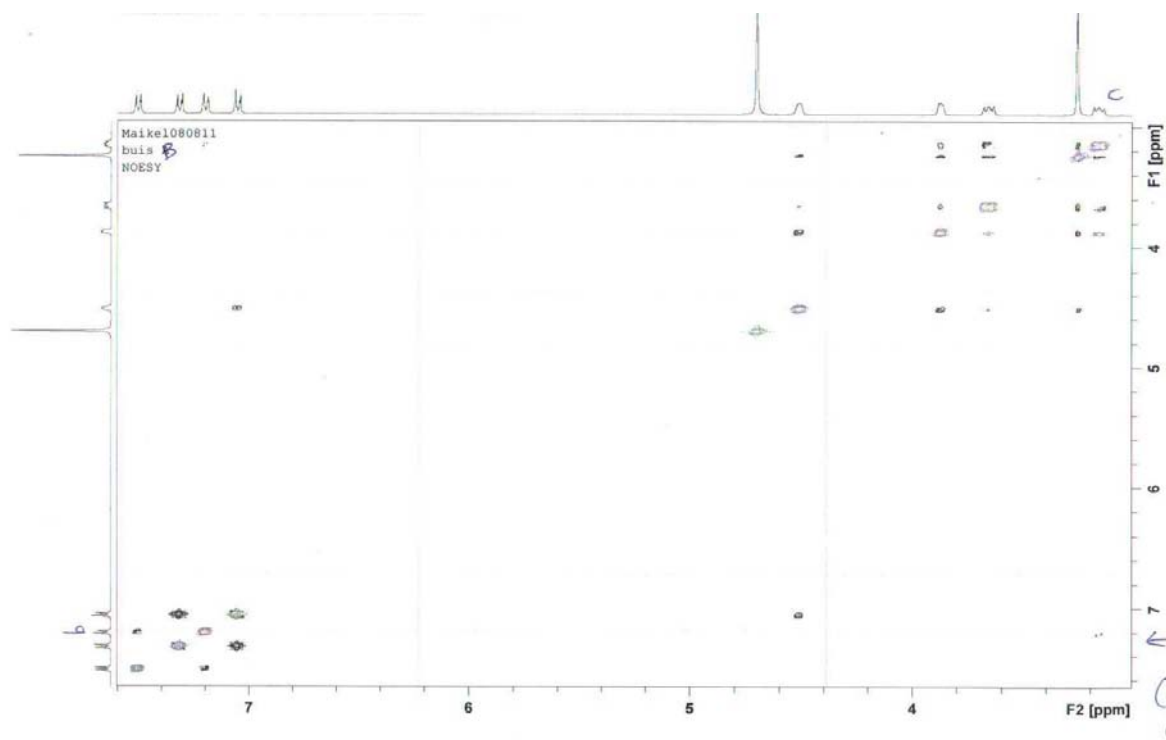

**Figure S7.** 2D-NOESY of compound **1** in D<sub>2</sub>O.

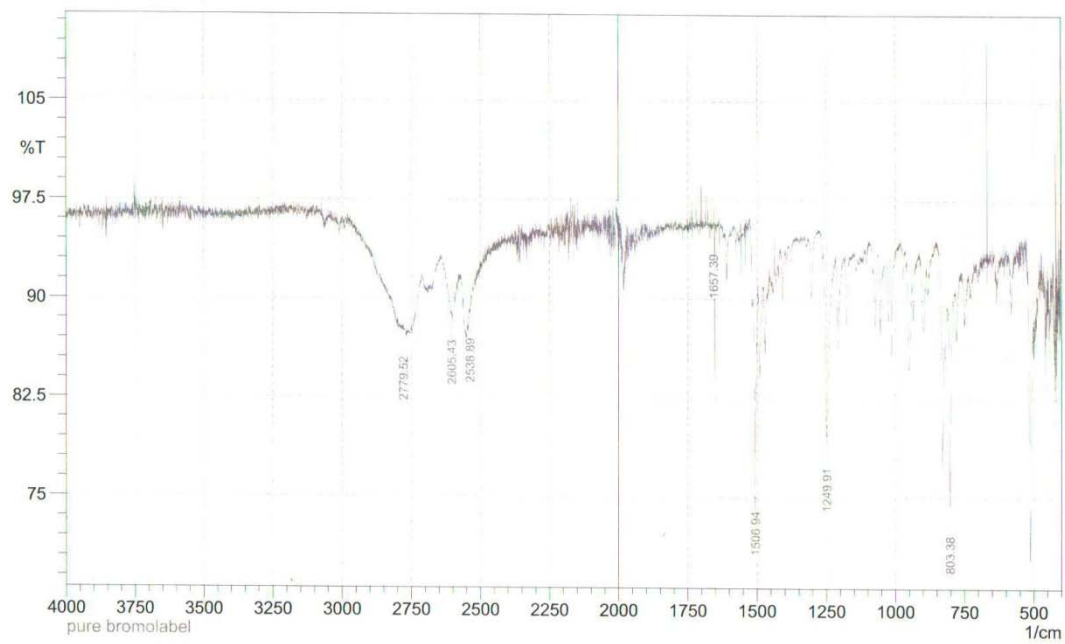

**Figure S8.** IR-spectrum of compound **1** as a solid.

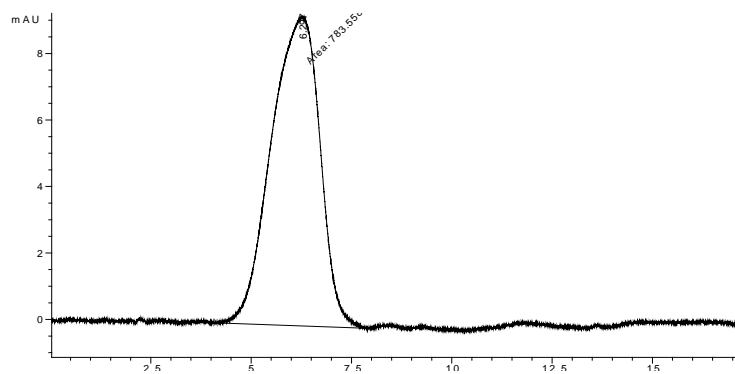

**Figure S9.** LC-UV chromatogram of compound **1** (detection at 277 nm).



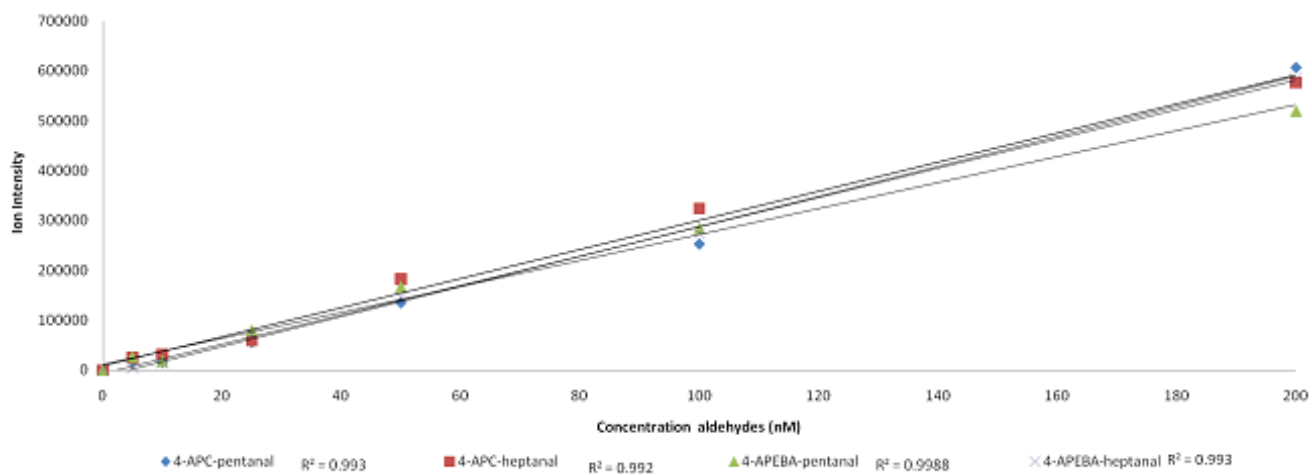

**Figure S10:** Signal intensity (EIC of a single m/z) comparison between 4-APC and 4-APEBA derivatives.

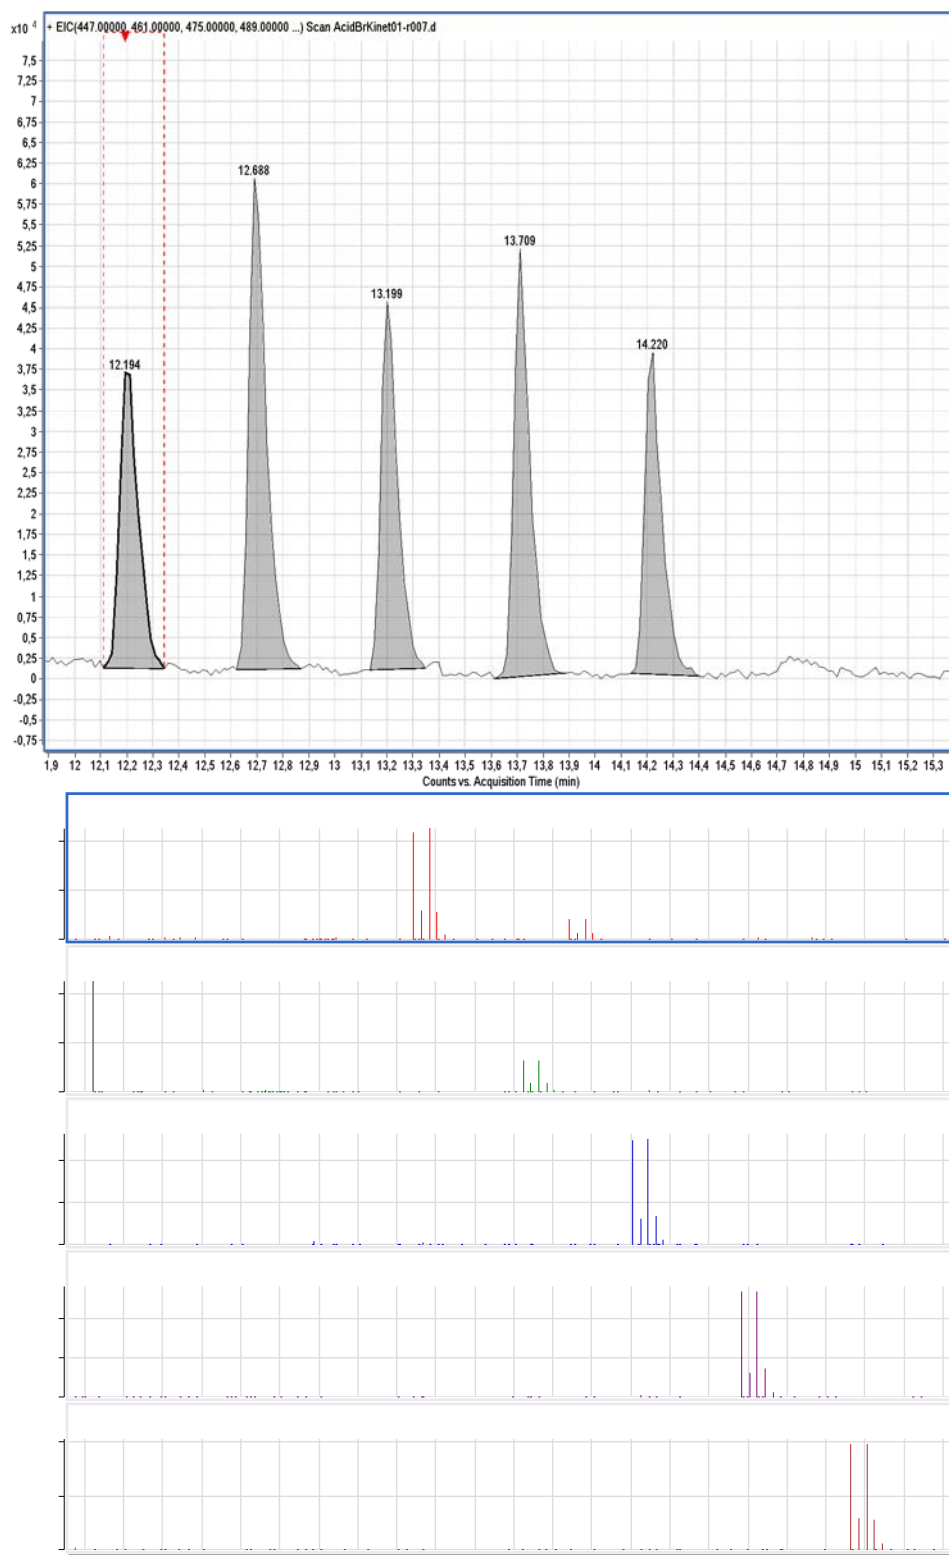

**Figure S11:** Combined extracted ion chromatogram of pentanoic acid, hexanoic acid, heptanoic acid, octanoic acid and nonanoic acid with respectively the corresponding MS traces.

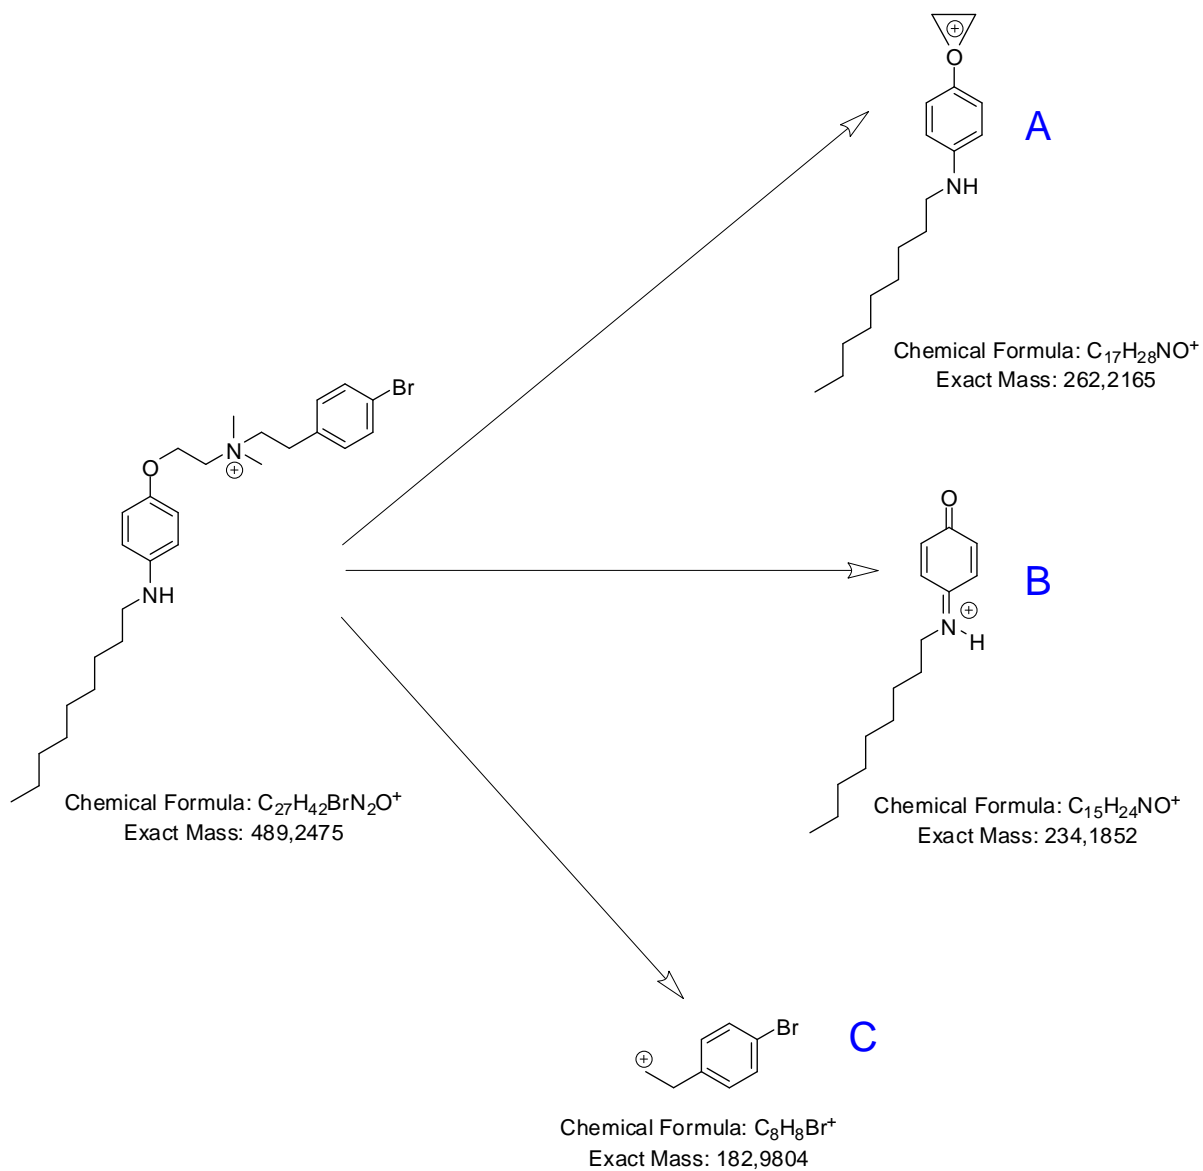

**Figure S12:** Major fragmentations of the adduct of 4-APEBA and nonanal

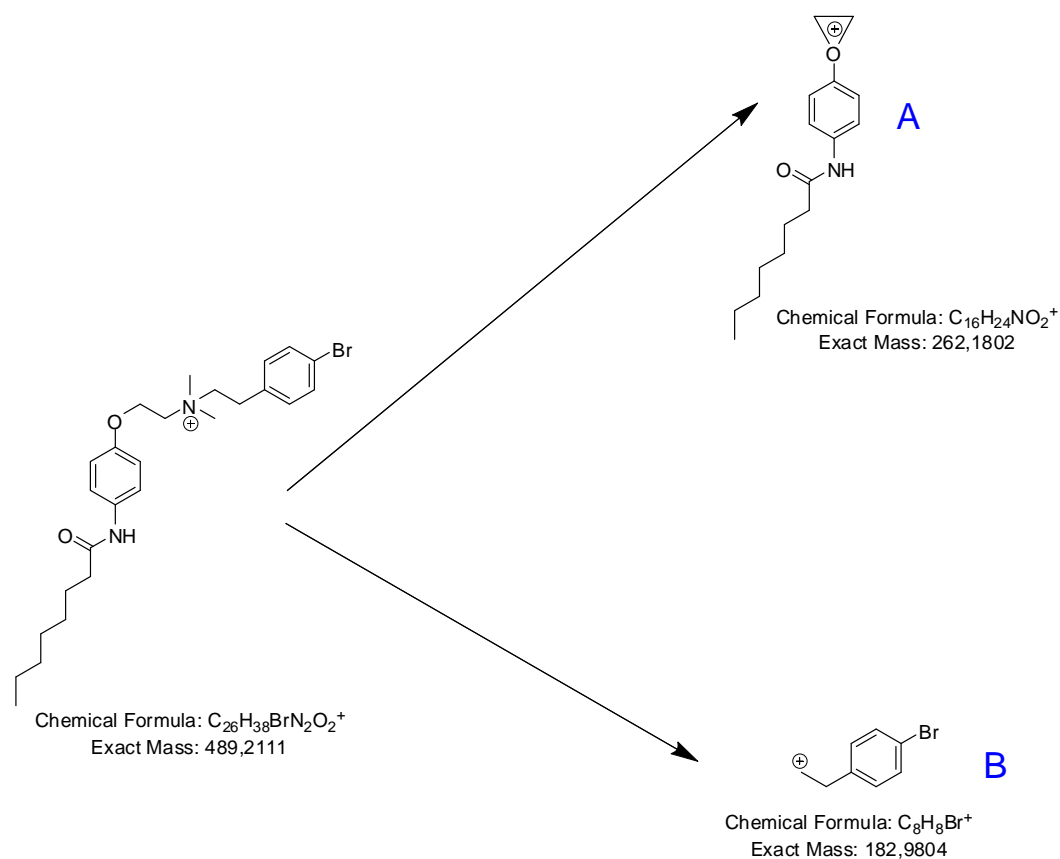

**Figure S13:** Major fragmentations of the adduct of 4-APEBA and octanoic acid.

**Table S1:** Chemical formulas generated from extract mass measurements.

| Compounds                            | $t_R$ | Formula (M <sup>+</sup> ) | Score | Mass     | Calc Mass | Abs Diff (ppm) |
|--------------------------------------|-------|---------------------------|-------|----------|-----------|----------------|
| Octanal in human plasma              | 18.37 | $C_{26}H_{40}BrN_2O$      | 100   | 475.2325 | 475.2324  | 0.15           |
| Octanal human plasma +AAPH           | 18.45 | $C_{26}H_{40}BrN_2O$      | 100   | 475.2317 | 475.2324  | 1.59           |
| Oxidized aldehyde human plasma       | 16.91 | $C_{24}H_{34}BrN_2O_3$    | 100   | 477.1757 | 477.1753  | 0.96           |
| Oxidized aldehyde human plasma +AAPH | 17.05 | $C_{24}H_{34}BrN_2O_3$    | 100   | 477.1739 | 477.1753  | 2.81           |
